17. Riminesi C, Andreuccetti D, Fossi R, Pezzati M: ELF magnetic field exposure in a neonatal intensive care unit. *Bioelectromagnetics* 2004; 25:481-91
18. Lee JH, Lee HC, Kim HD, Kim JY, Kim DW, Nam YT, Kim KJ: How much are anesthesiologists exposed to electromagnetic fields in operating rooms? *Yonsei Med J* 2003; 44:133-7
19. Svenska Elektriska dommissionen (SEK): Computers and office machines: Measuring methods for electric and magnetic near fields, 2nd ed. Stockholm, Sweden, 1995, Report No. SS 436-14-90
20. NIEHS Working Group Report: Assessment of health effects from exposure to power-line frequency electric and magnetic fields 1998; NIEHS Publication No. 98-3981
21. Savitz DA, Wachtel H, Barnes FA, John EM, Tvrdik JG: Case-control study of childhood cancer and exposure to 60 Hz magnetic fields. *Am J Epidemiol* 1988; 128:21-38
22. Feychting M, Ahlbom A: Magnetic fields and cancer in children residing near Swedish high-voltage power lines. *Am J Epidemiol* 1993; 138:467-81
23. Floderus B, Persson T, Stenlund C, Wennberg A, Ost A, Knave B: Occupational exposure to electromagnetic fields in relation to leukemia and brain tumors: A case-control study in Sweden. *Cancer Causes Control* 1993; 4:465-76
24. Kheifets LI, Afifi AA, Buffler PA, Zhang ZW, Matkin CC: Occupational electric and magnetic field exposure and leukemia. A meta-analysis. *J Occup Environ Med* 1997; 39:1074-91
25. Sahl JD, Kelsh MA, Greenland S: Cohort and nested case-control studies of hematopoietic cancers and brain cancer among electric utility workers. *Epidemiology* 1993; 4:104-14
26. Stenlund C, Floderus B: Occupational exposure to magnetic fields in relation to male breast cancer and testicular cancers: A Swedish case-control study. *Cancer Causes Control* 1997; 8:184-91
27. Thériault G, Goldberg M, Miller AB, Armstrong B, Guénel P, Deadman J, Imbernon E, To T, Chevalier A, Cyr D, Wall C: Cancer risks associated with occupational exposure to magnetic fields among electric utility workers in Ontario and Quebec, Canada and France: 1970-1989. *Am J Epidemiol* 1994; 139:550-72

## ■ ANESTHESIOLOGY REFLECTIONS

### Withering and the Foxglove

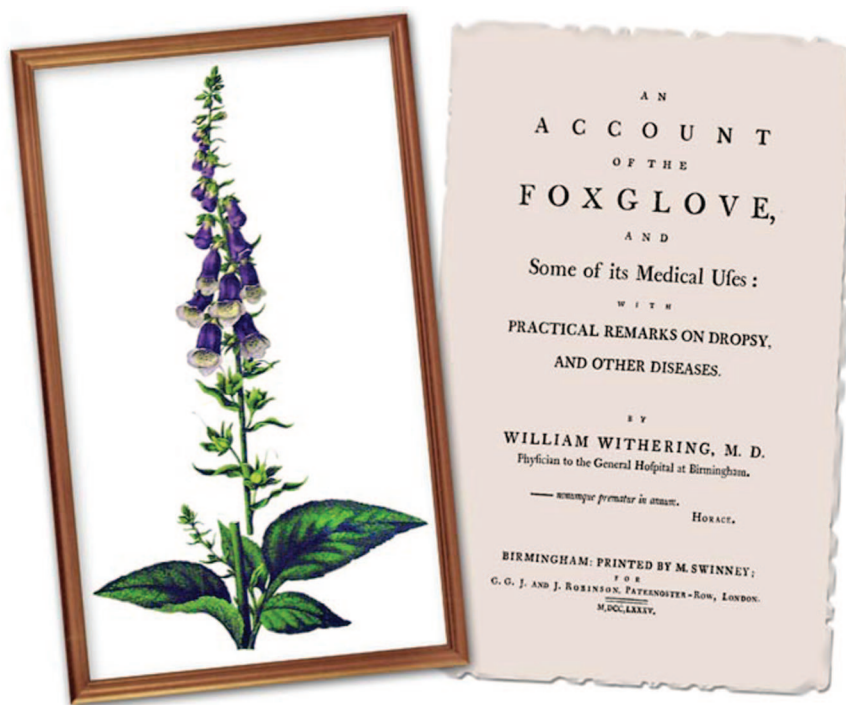

An Edinburgh-trained physician, William Withering (1741-1799) had observed successful treatment of congestive heart failure ("dropsy") by a lady herbalist from his native region of Shropshire, England. After isolating foxglove (*Digitalis purpurea*) as the active ingredient in her 20-herb infusion, Withering spent nine years defining the correct dosage of powdered foxglove that would "scatter dropsy" without digitoxic side effects like headache and nausea. Withering's research was nearly lost to the world when pirates pursued his ship back from Portugal during convalescence for "consumption." The year 1785 saw his election as Fellow of the Royal Society and the publication of his classic *An Account of the Foxglove* . . . (depicted above alongside its foldout engraving, courtesy of the Wood Library-Museum). As tuberculosis sapped the strength of foxglove's champion, a visiting punster and well-wisher quipped, "The flower of English physicians is indeed withering." (Copyright © the American Society of Anesthesiologists, Inc. This image appears in color in the *Anesthesiology Reflections* online collection available at [www.anesthesiology.org](http://www.anesthesiology.org).)

George S. Bause, M.D., M.P.H., Honorary Curator, ASA's Wood Library-Museum of Anesthesiology, Park Ridge, Illinois, and Clinical Associate Professor, Case Western Reserve University, Cleveland, Ohio. [UJYC@aol.com](mailto:UJYC@aol.com).
